# Supplementary material for: Structure, dynamics and RNA binding of the multi-domain splicing factor TIA-1
Source: PubMed Central journal article supplement — Nucleic Acids Res. 2014 Mar 25;42(9):5949–66. doi: 10.1093/nar/gku193 (PMC4027183; doi:10.1093/nar/gku193), 2014-03-25
Supplement: supp_gku193_nar-03485-r-2013-File010.pdf [file supp_gku193_nar-03485-r-2013-File010.pdf]

## SUPPLEMENTARY INFORMATION

### *NMR titrations of TIA-1-RRM2 and -RRM3 with U9 RNA*

RNA binding of individual RRM of TIA-1 was analyzed by adding known amounts of U9 to 0.1 mM of  $^{15}\text{N}$ -labelled RRM, and  $^1\text{H}$ ,  $^{15}\text{N}$  HSQC spectra were recorded after each titration to measure the chemical shift of each amide resonance. U9 in small volumes with highly concentrated solutions were titrated into the protein samples leading to negligible dilution. At least 10 different protein:RNA ratios were used for each interaction, ranging from 1:0.1 to 1:1.8 ratio for RRM3 and 1:2 ratio for RRM2. The ligand binding occurred in the fast-exchange regime, and peaks in the NMR spectra were manually traced and checked by NMRView. Binding constants for each residue (without severely overlapped resonances) were determined by fitting with non-linear regression analysis to the change in chemical shift versus additional U9 concentrations by the following equation:

$$\Delta_{obs} = \Delta_{max} \cdot \frac{(K_D + [L] + [P]) - \sqrt{(K_D + [L] + [P])^2 - 4[P][L]}}{2[P]}$$

where  $\Delta_{obs}$  is the observed change in chemical shift,  $\Delta_{max}$  is the total change in chemical shift at saturation,  $[L]$  and  $[P]$  are titrated RNA and total protein concentrations respectively. Given that a single stranded RNA with ~4-7 nucleotides has been recognized frequently by a single RRM (1,2), a Hill coefficient was included to consider the possibility of binding in multiple registers to the U9 RNA. Generally speaking, a Hill coefficient equal to one ( $n = 1$ ) indicates binding of RRM and RNA with a stoichiometry of 1:1 binding without any cooperativity. A Hill coefficient greater than one ( $n > 1$ ) suggests multiple binding sites with positive cooperativity. Titration profiles for several amide groups of RRM2 and RRM3 were fitted with the software package GraphPad Prism (version 6.00 for Mac, GraphPad Software, La Jolla California USA, [www.graphpad.com](http://www.graphpad.com)). Global fits of five selected residues from RRM2 and RRM3 are shown in the right panel of **Suppl. Fig. S3** with (red line) or without considering a Hill coefficient (grey dashed line). The global fit results of five selected residues of RRM2 ( $K_D = 36.70 \pm 1.28 \mu\text{M}$ ,  $n = 1.58 \pm 0.08$  with  $R^2 = 0.9956$ ) and RRM3 ( $K_D = 32.97 \pm 0.56 \mu\text{M}$ ,  $n = 1.43 \pm 0.03$  with  $R^2 = 0.9992$ ) suggest the presence of multiple binding registers.

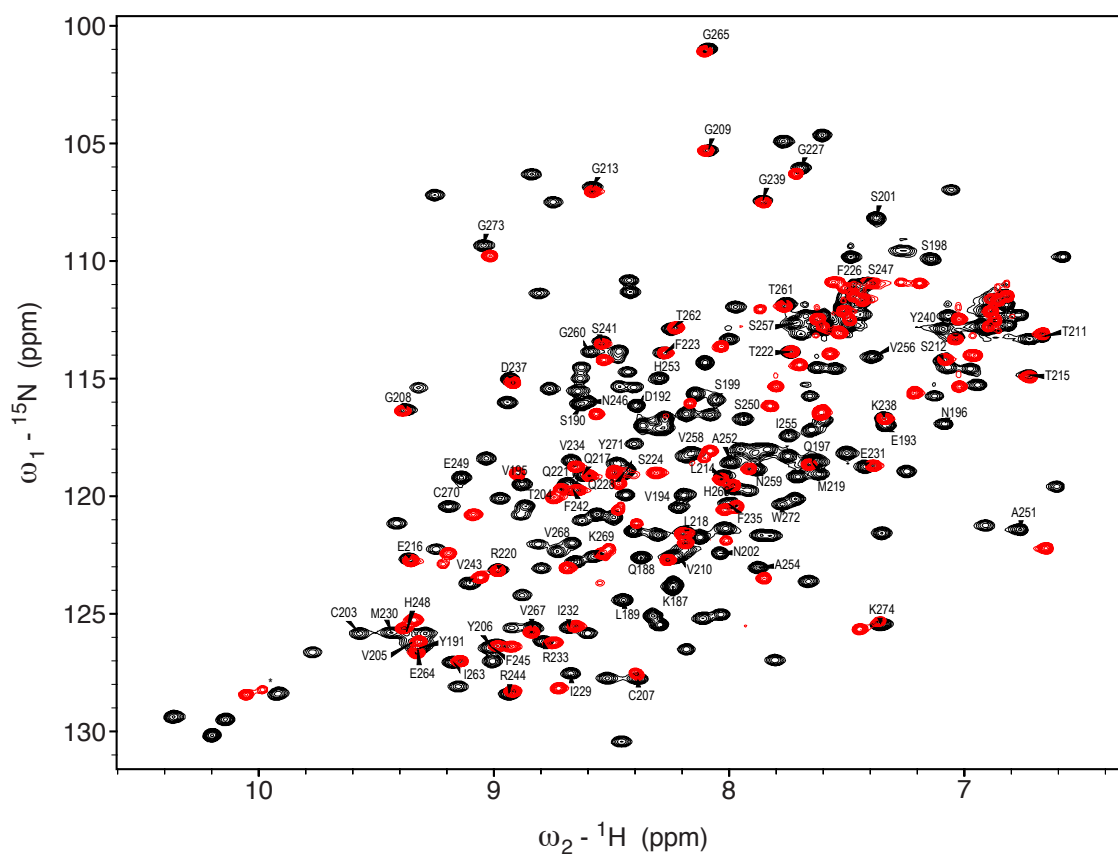

**Fig. S1**

Superposition of  $^1\text{H}$ ,  $^{15}\text{N}$ -HSQC spectra of truncated RRM3 without the N-terminal helix (195-274) in red and RRM2,3 in black. Amide signals of RRM3 are annotated.

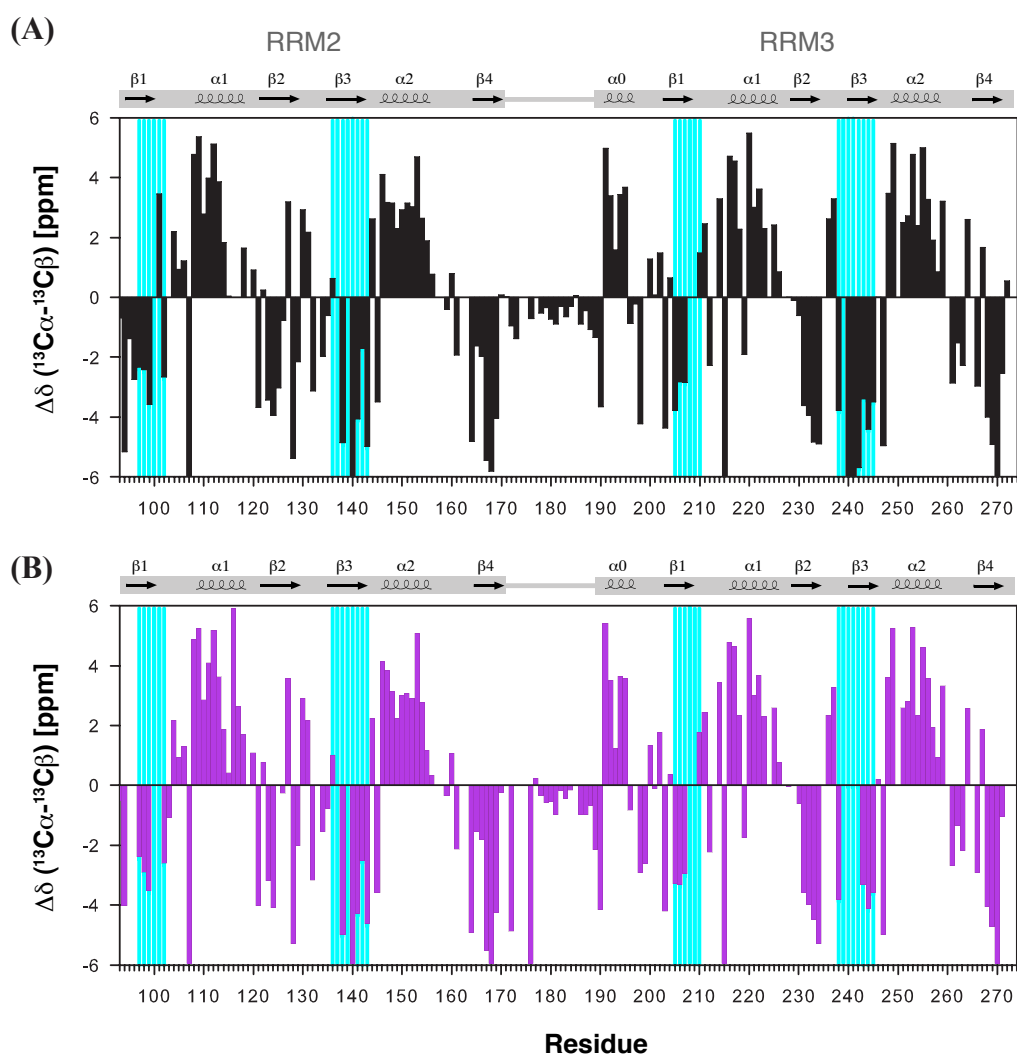

**Fig. S2**

Secondary  $^{13}\text{C}$  chemical shifts  $\Delta\delta(^{13}\text{C}\alpha-^{13}\text{C}\beta)$  of TIA-1-RRM2,3 (A) free (black) and (B) bound to fas<sub>16</sub> RNA (purple) predicted from  $\text{H}\alpha$ ,  $\text{C}\alpha$ ,  $\text{C}\beta$ , and  $\text{C}'$  chemical shifts by TALOS+. Residues with negative CSI indicate  $\beta$ -strands while positive values indicate turn or  $\alpha$ -helical conformations. The CSI of residue 191-196 indicates the presence of an additional  $\alpha$ -helix. Comparison of (A) and (B) indicates that the secondary structure is not altered RNA binding by TIA-1 RRM2,3.

(A) TIA-1-RRM2 vs. U9

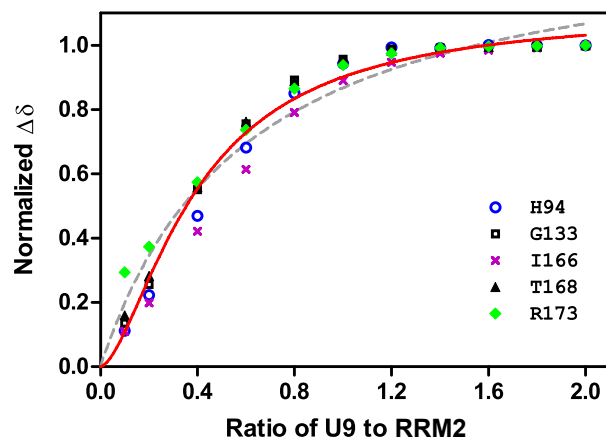

(B) TIA-1-RRM3 vs. U9

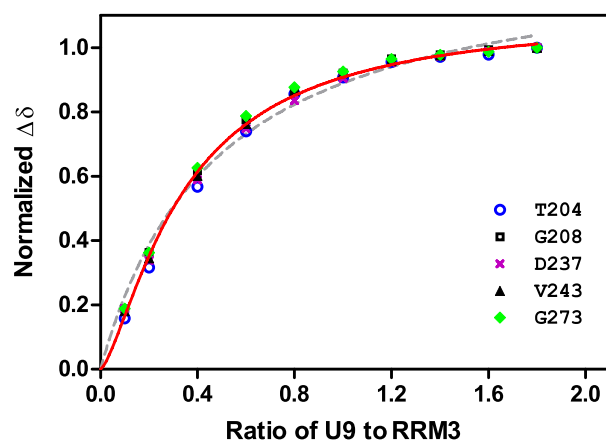

**Fig. S3**

Analysis of NMR titrations of TIA-1-RRM2 and -RRM3 with U9 RNA. Titration profiles for selected amide groups of each RRM (Fig. 4D, E) were normalized and analyzed by global fitting with (red line) or without (grey dashed line) including a Hill coefficient for a “one site-specific binding” model using the program Prism. Peaks showing intermediate exchange behaviors, e.g. Gly<sup>137</sup>, were not applied to the fitting.

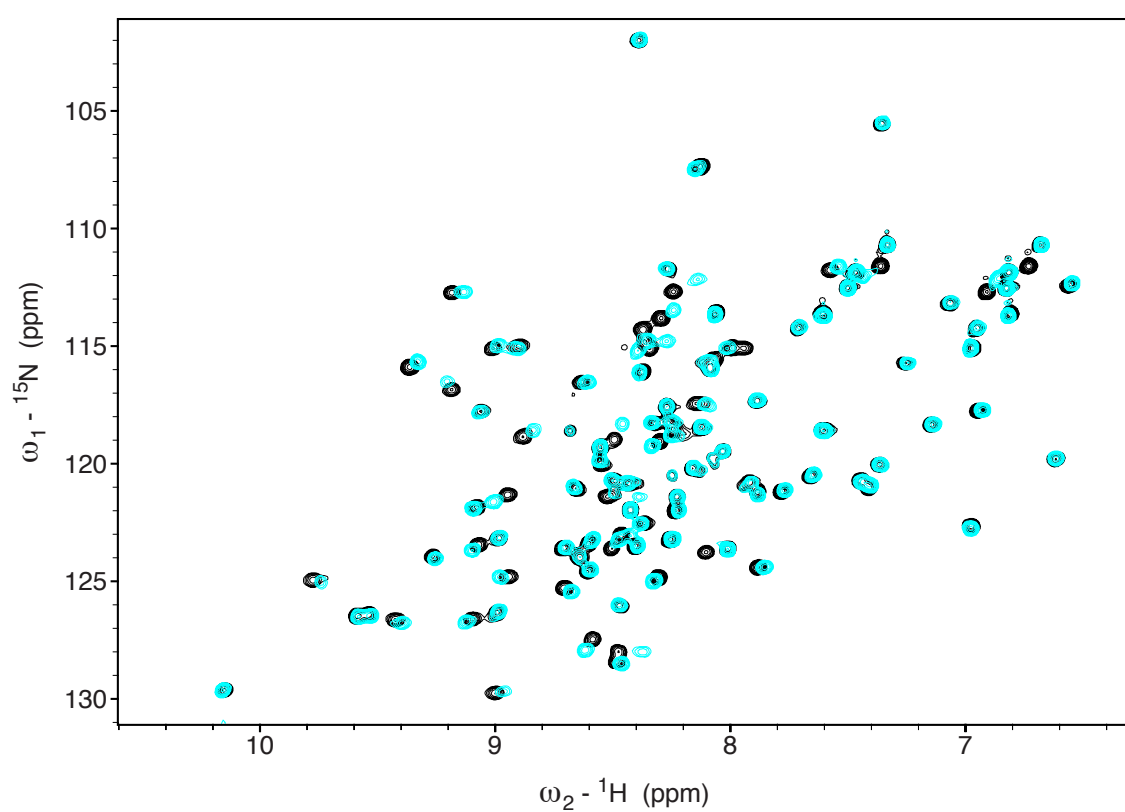

**Fig. S4**

Superposition of  $^1\text{H}$ ,  $^{15}\text{N}$ -HSQC spectra of RRM1 free (black) and bound to U9 RNA (cyan) at 1:2 molar ratio.

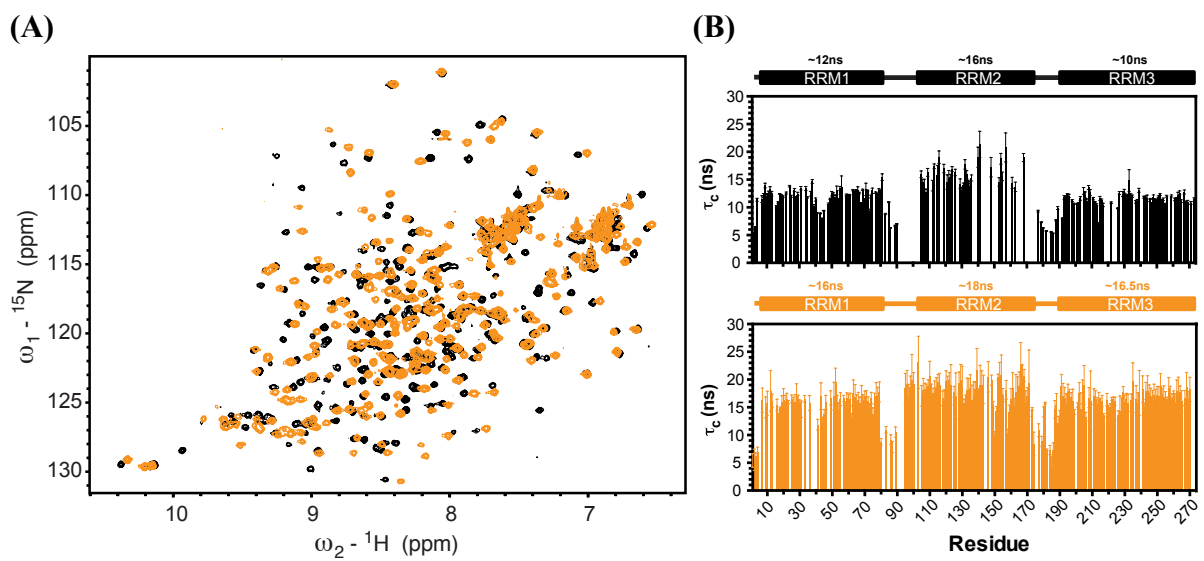

**Fig. S5**

The  ${}^1\text{H}$ ,  ${}^{15}\text{N}$  HSQC NMR spectra of RRM1,2,3 free (black) and bound with U15 RNA (orange) are shown in (A) and the corresponding rotational correlation times ( $\tau_c$ ) estimated from the ratio of  ${}^{15}\text{N}$   $R_2/R_1$  relaxation rates of RRM1,2,3 free (black) and U15 bound form (orange) as a function of residue number are represented in (B). The average  $\tau_c$  values for each RRM domain are indicated above.

**(A)**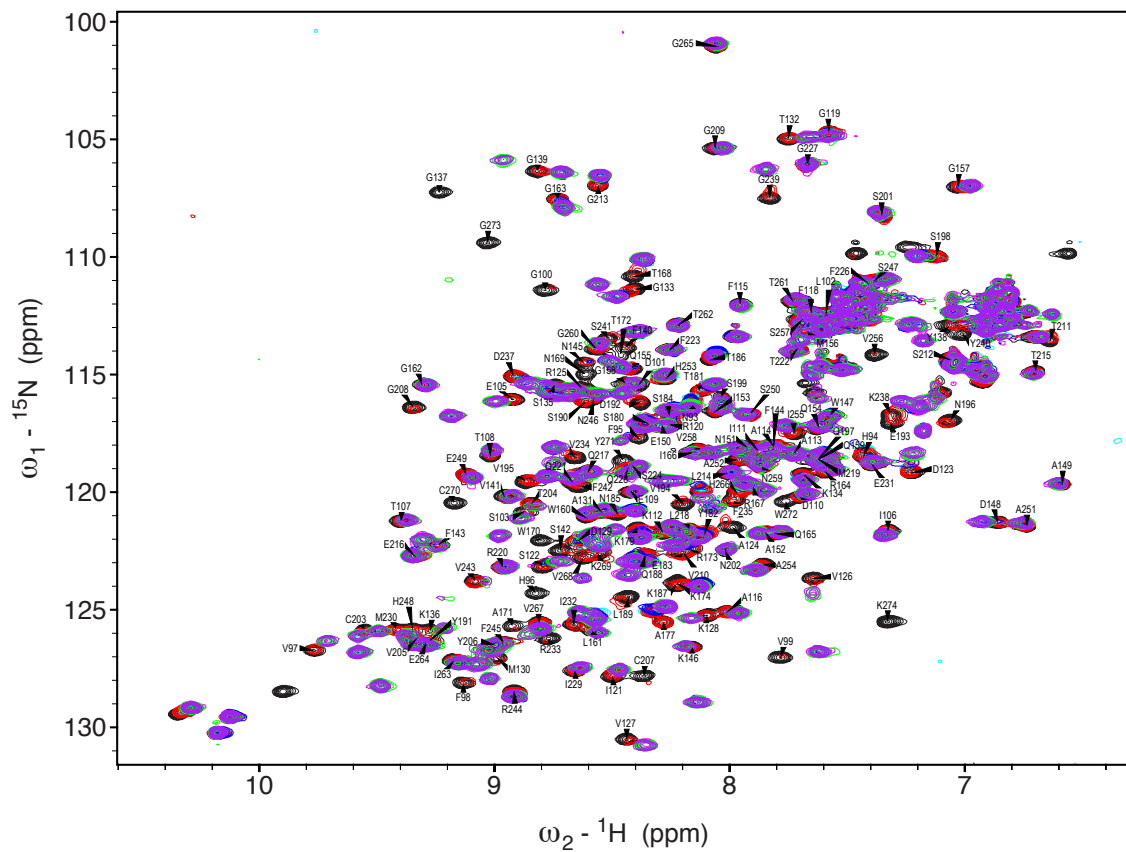**(B)**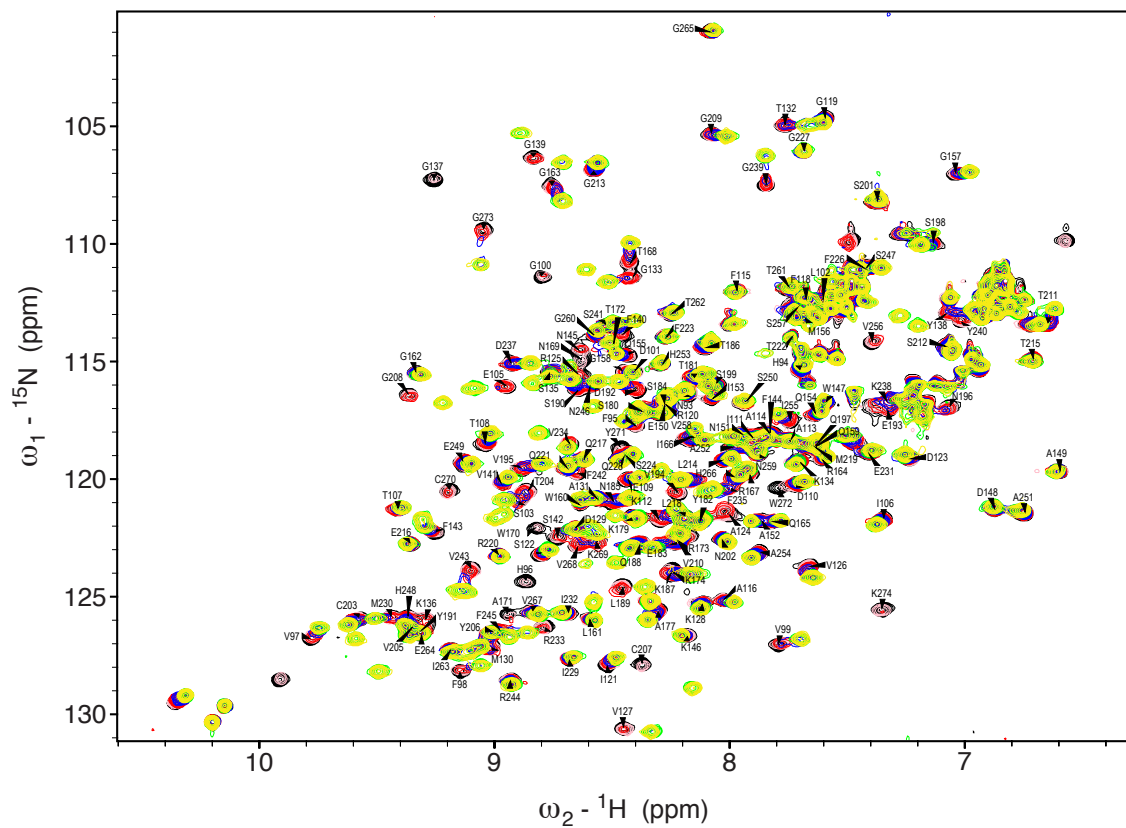**Fig. S6**

NMR titration of TIA-1-RRM2,3 with fas<sub>16</sub> (A) and U9 RNA (B). (A) Spectra are colored as: free protein (black), with 0.2 (cyan), 0.4 (red), 0.6 (magenta), 0.8 (blue), 1.0 (green) and 2.0 (purple) molar equivalents of fas<sub>16</sub> RNA, and (B) with U9 RNA: 0.1 (pink), 0.2 (red), 0.4 (blue), 0.8 (green) and 1.25 (yellow) molar equivalents.

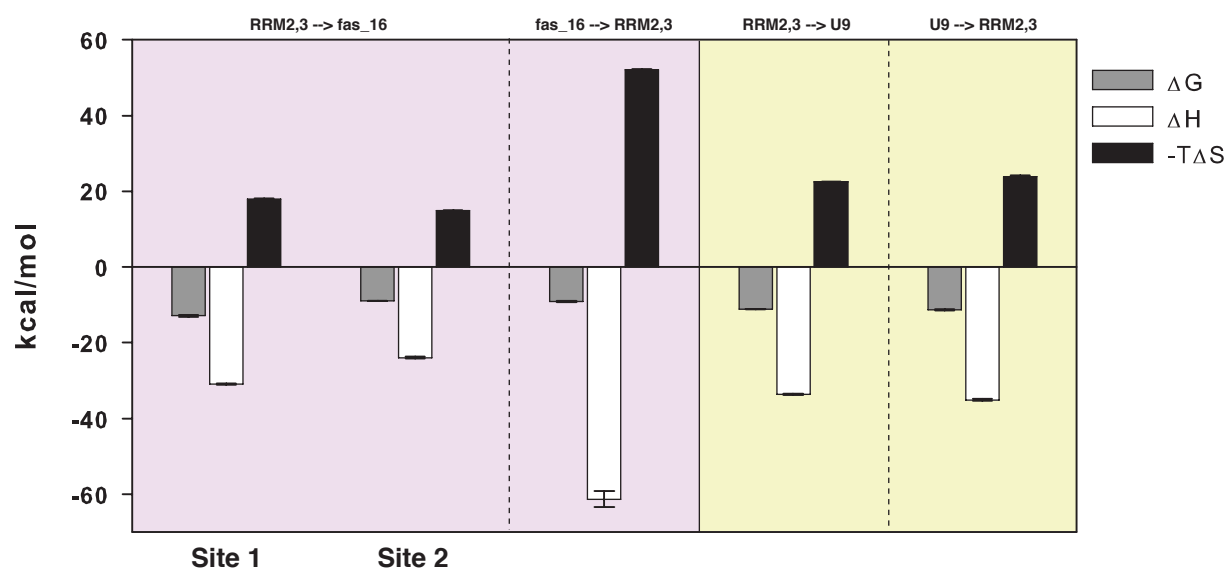

**Fig. S7**

Thermodynamic parameters for TIA-1-RRM2,3 binding to fas\_16 and U9 RNAs determined from isothermal titration calorimetry measurements. All interactions are enthalpically favored with negative  $\Delta H$ .

**(A) TIA-1-RRM2,3 vs. *fas\_10***

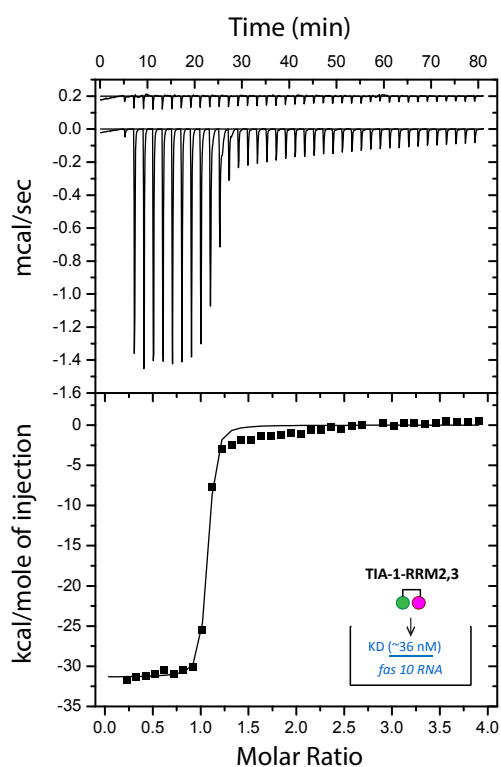

**(B) TIA-1-RRM1,2,3 vs. U15**

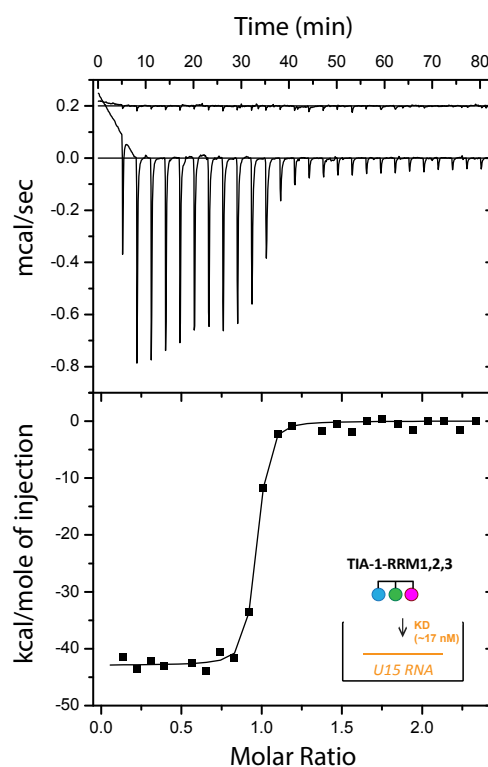

**Fig. S8**

(A) ITC measurements for the binding of TIA-1-RRM2,3 to *fas\_10* RNA: by adding 577  $\mu$ M RRM2,3 as titrant into 30  $\mu$ M RNA. The dilution heat of the titrant is shown shifted by a value of 0.2  $\mu$ cal/sec on top. (B) Binding of TIA-1-RRM1,2,3 to U15 RNA: 167  $\mu$ M RM1,2,3 into 15  $\mu$ M RNA. The fitted data for the titrations are reported in Table 2.

**SUPPLEMENTARY REFERENCES:**

1. Shamoo, Y., Abdul-Manan, N., Patten, A.M., Crawford, J.K., Pellegrini, M.C. and Williams, K.R. (1994) Both RNA-binding domains in heterogenous nuclear ribonucleoprotein A1 contribute toward single-stranded-RNA binding. *Biochemistry*, **33**, 8272-8281.
2. Varani, G. and Nagai, K. (1998) RNA recognition by RNP proteins during RNA processing. *Annu Rev Biophys Biomol Struct*, **27**, 407-445.

**SUPPLEMENTARY TABLE 1.** SAXS Data collection and scattering-derived parameters

|                                            | TIA-1 RRM2,3 free | TIA-1 RRM2,3 16mer bound |
|--------------------------------------------|-------------------|--------------------------|
| Data-collection                            |                   |                          |
| Instrument                                 | BioSAXS BM29 ESRF | BioSAXS BM29 ESRF        |
| Beam geometry                              | 10 mm slit        | 10 mm slit               |
| Wavelength (Å)                             | 1.008             | 1.008                    |
| $q$ range (Å <sup>-1</sup> )               | 0.004-0.45        | 0.004-0.45               |
| Exposure time (s) <sup>a</sup>             | 2                 | 2                        |
| Concentration range (mg ml <sup>-1</sup> ) | 2-10              | 2-3                      |
| Temperature (K)                            | 298               | 298                      |
| Structural parameters <sup>b</sup>         |                   |                          |
| $I(0)$ (cm <sup>-1</sup> ) [from P(r)]     | 21.1 ± 0.018      | 25.4 ± 0.015             |
| $R_g$ (Å) [from P(r)]                      | 24.4 ± 0.003      | 21.6 ± 0.003             |
| $I(0)$ (cm <sup>-1</sup> ) [from Guinier]  | 21.1 ± 0.025      | 25.5 ± 0.021             |
| $R_g$ (Å) [from Guinier]                   | 24.1 ± 0.096      | 22.0 ± 0.264             |
| $D_{max}$ (Å)                              | 80                | 67                       |
| Porod volume estimate (Å <sup>3</sup> )    | 29160             | 31740                    |
| Molecular mass determination <sup>b</sup>  |                   |                          |
| Molecular mass $M_r$ [from $I(0)$ ]        | 19.9 kDa          | 22.5 kDa                 |
| Calculated monomeric $M_r$ from sequence   | 20.2 kDa          | 25.3 kDa                 |
| Software employed                          |                   |                          |
| Primary data reduction                     | BsxCuBE           | BsxCuBE                  |
| Data processing                            | PRIMUS            | PRIMUS                   |

<sup>a</sup>10 frames were recorded for each sample.<sup>b</sup>reported for a 2 mg/ml measurement
